# Supplementary material for: Genome-Wide Identification and Characterization of the ALOG Domain Genes in Rice
Source: Hindawi journal article supplement (doi:10.1155/2019/2146391), 2019-02-24
Supplement: f1 [file 2146391.f1.pdf]

---

**Supplementary Materials for “Genome-wide identification and characterization  
of the ALOG domain gene family in rice”**

Na Li<sup>1</sup>, Yang Wang<sup>1</sup>, Jing Lu<sup>2</sup> and Chuan Liu<sup>1,3</sup>

<sup>1</sup>State Key Laboratory of Hybrid Rice, College of Life Sciences, Wuhan University, Wuhan 430072,  
China

<sup>2</sup>College of Food Science and Technology, Huazhong Agricultural University, Wuhan 430070, China

<sup>3</sup>Chongqing Key Laboratory on Big Data for Bio Intelligence, Chongqing University of Posts and  
Telecommunications, Chongqing 400065, China.

Correspondence should be addressed to Chuan Liu; liuchuan@whu.edu.cn

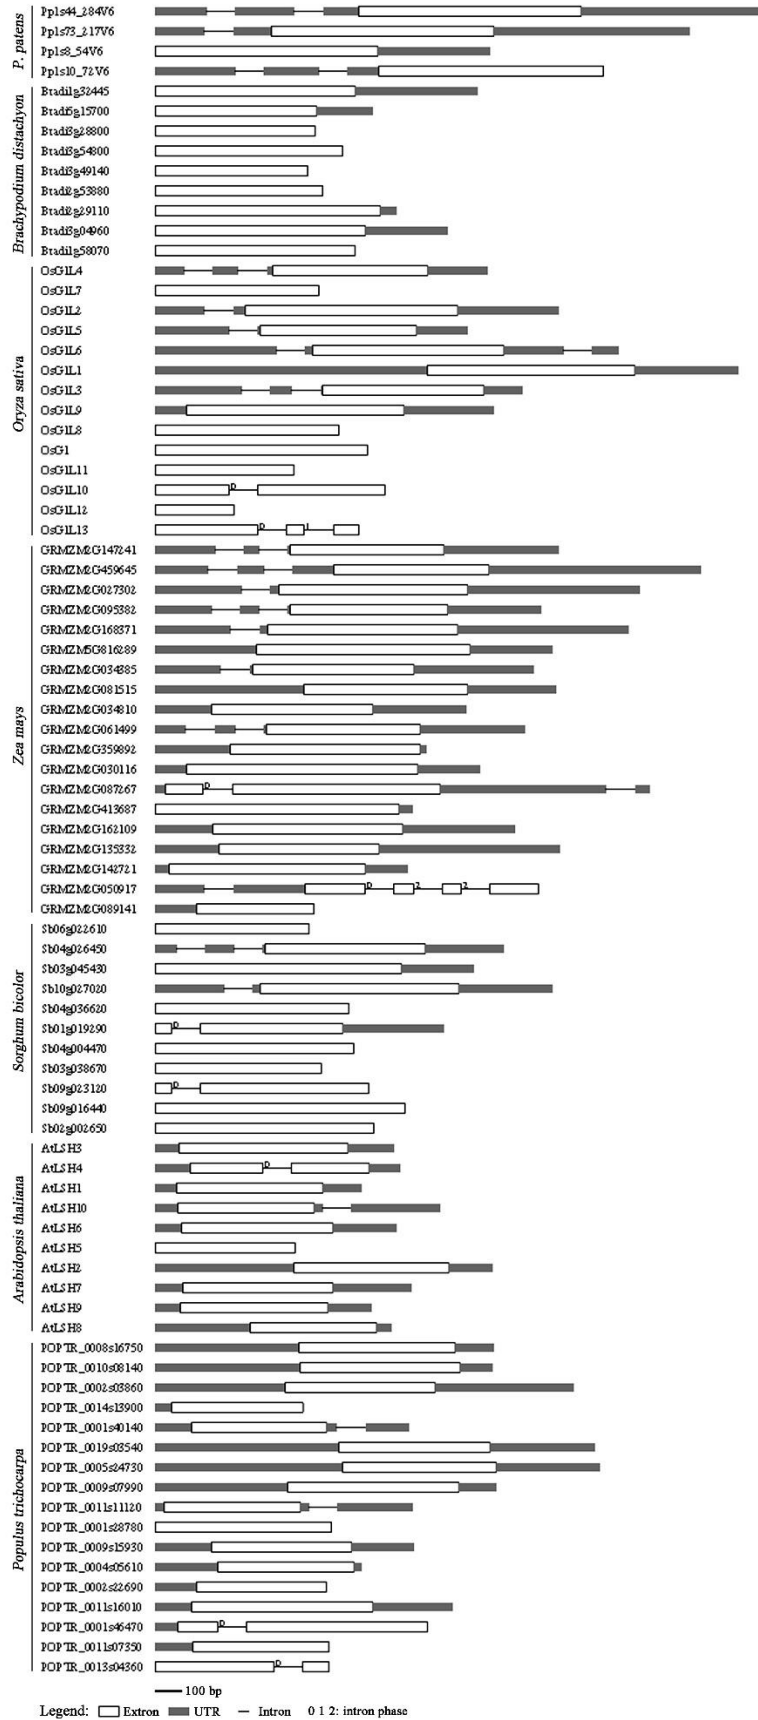

**Figure S1:** The gene structure of ALOG domain genes in seven species. The size of each gene can be estimated using the black bar (100 bp) at the bottom of the figure. White boxes, exons; gray boxes, UTRs; lines, introns.

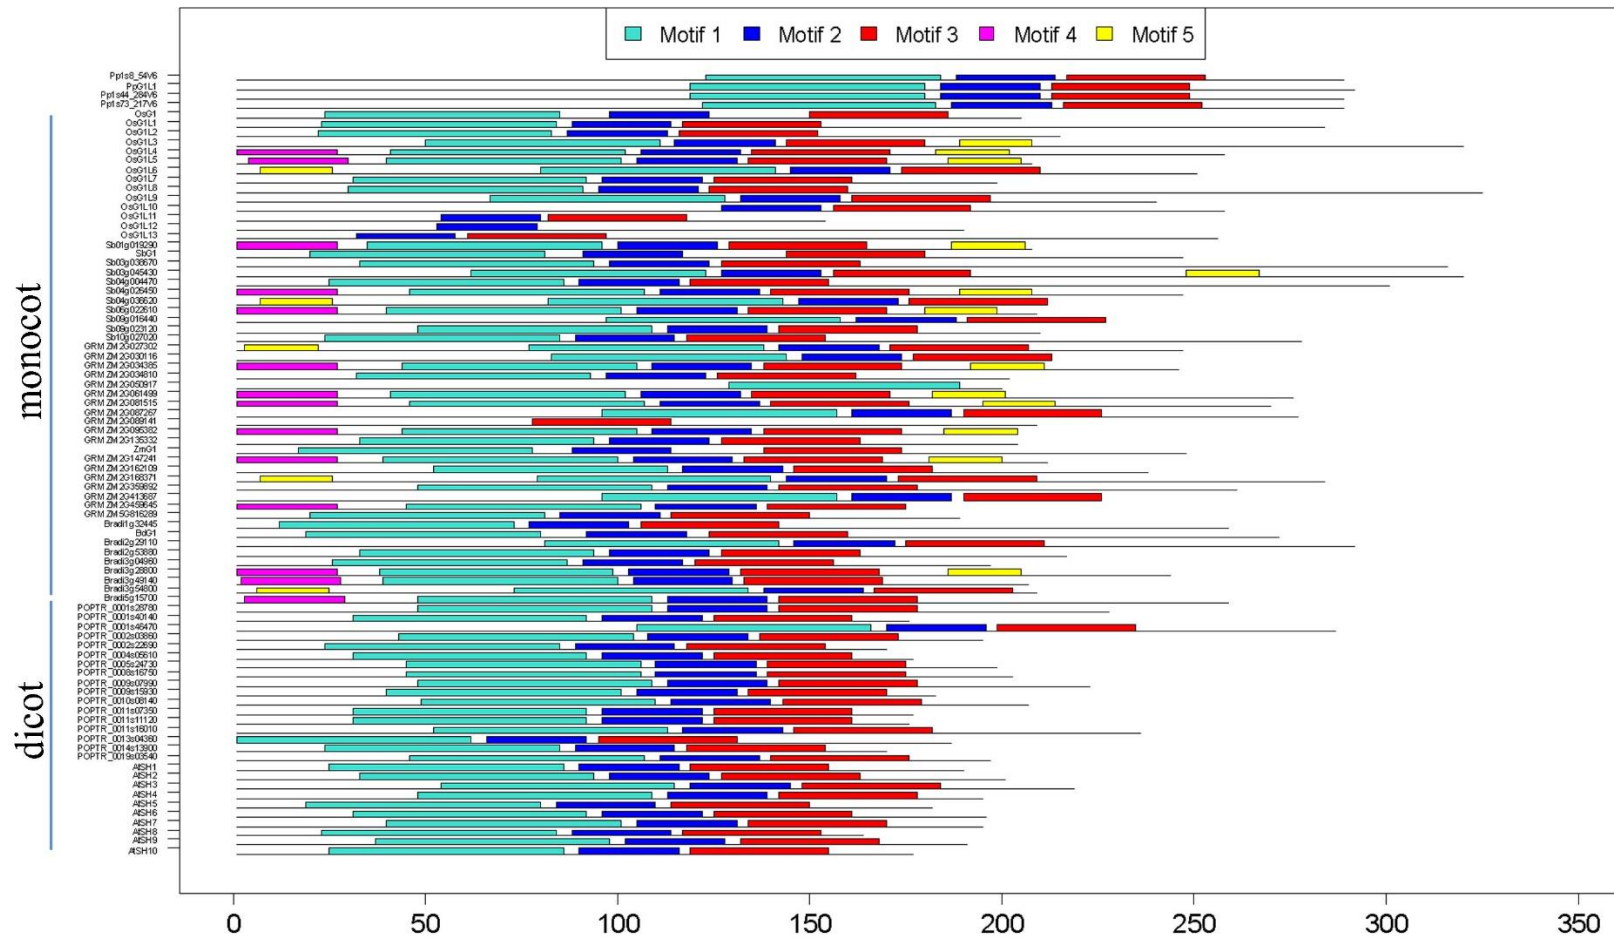

**Figure S2:** Distribution of conserved motifs in ALOG domain proteins identified using the MEME search tool. Five putative motifs were identified, in which motifs 1, 2 and 3 specify the ALOG domain, while motifs 4 and 5 are newly discovered in the present study. Different motifs are indicated by different colors, and the names of all members are shown at the top of the figure. The motif sizes are indicated at the bottom of the figure.

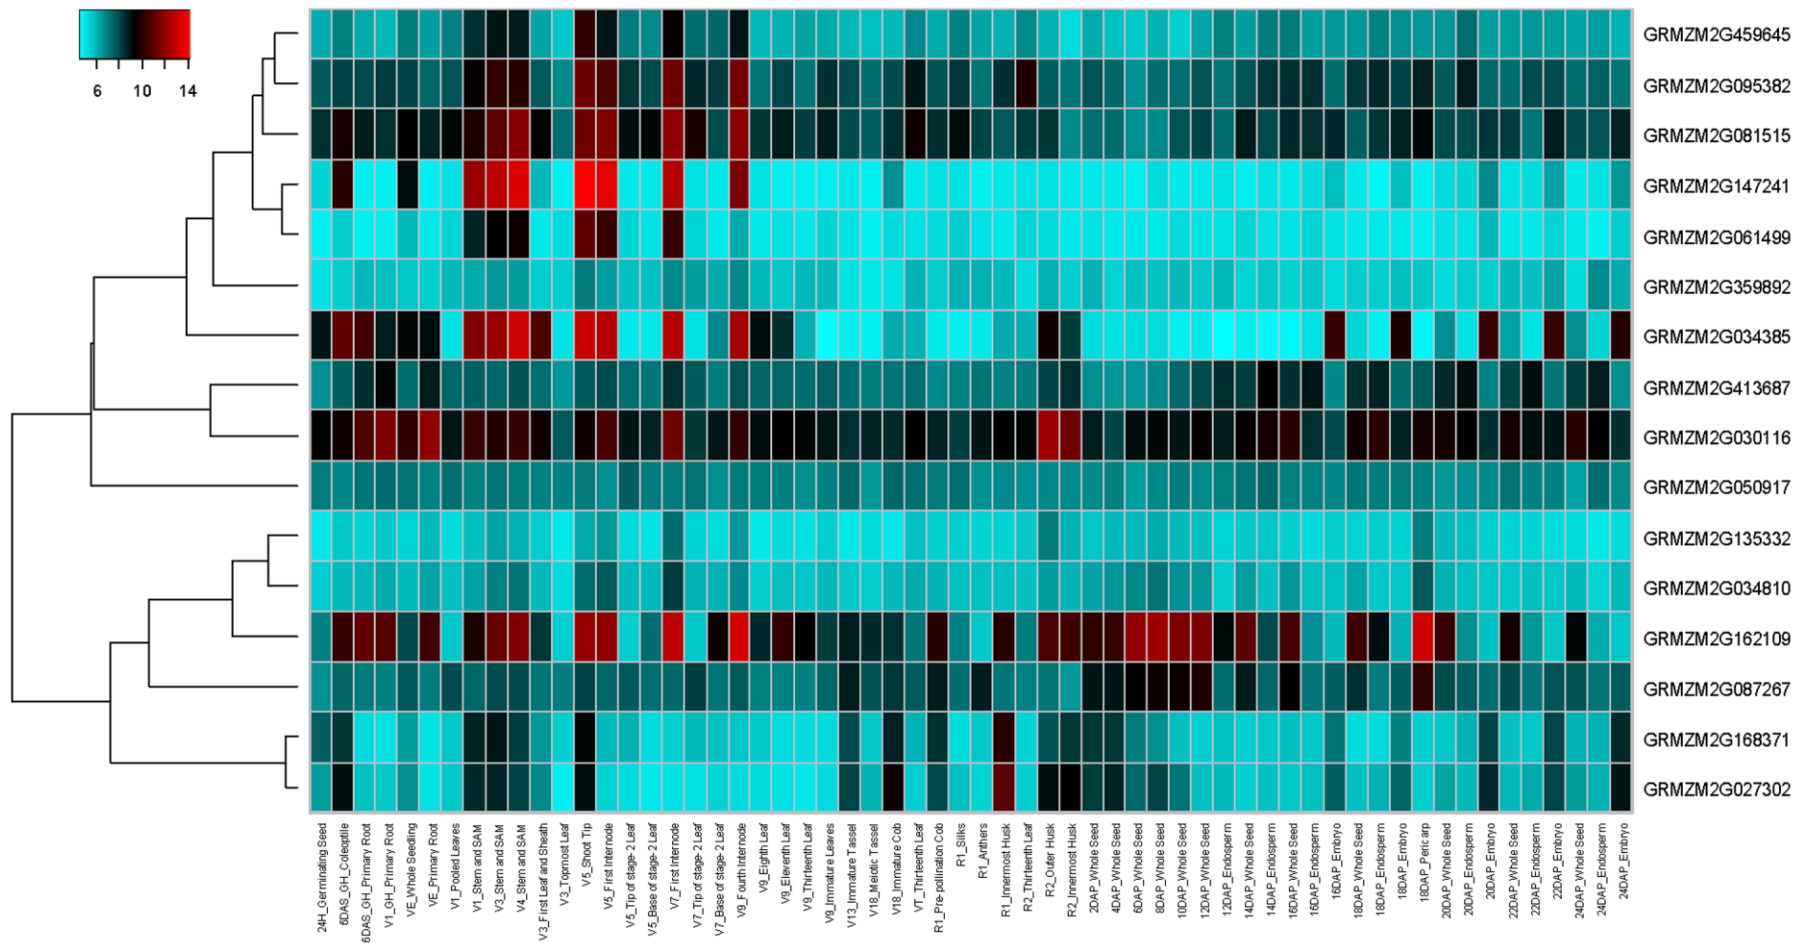

**Figure S3:** Genome-wide expression profile of ALOG domain genes in maize. The hierarchical clustering displays the expression profiles of the 16 ALOG domain genes in maize. The color scale at the top left represents the  $\log_2$ -transformed expression values. Cyan indicates a low expression level; black indicates a medium expression level; and red indicates a high expression level.

**Table S1:** Tissue samples of different developmental stages throughout the life cycle of rice

| Sample No                  | Abbreviation     | Tissues or organ       | Developmental stages                                        |
|----------------------------|------------------|------------------------|-------------------------------------------------------------|
| M1(Minghui)/Z1(Zhenshan)   | Calli 1          | Calli                  | 15 DAS (days after subculture)                              |
| M2(Minghui)/Z2(Zhenshan)   | Calli 2          | Calli                  | 5 DAR (days after regeneration)                             |
| M3(Minghui)/Z3(Zhenshan)   | Calli 3          | Calli                  | Screening stage                                             |
| M4(Minghui)/Z4(Zhenshan)   | Calli 4          | Calli                  | 15 DAI T2 (days after induction)                            |
| M5(Minghui)/Z5(Zhenshan)   | Calli 5          | Calli                  | 15 DAI T3 (days after induction)                            |
| M6(Minghui)/Z6(Zhenshan)   | Seed imbibition  | Seed                   | 72 h after imbibition                                       |
| M7(Minghui)/Z7(Zhenshan)   | Seed germination | Embryo bud and radicle | 3 days after germination                                    |
| M8(Minghui)/Z8(Zhenshan)   | Plumule/Dark     | Plumule                | 48 hours after emergence, dark                              |
| M9(Minghui)/Z9(Zhenshan)   | Plumule/Light    | Plumule                | 48 hours after emergence, light                             |
| M10(Minghui)/Z10(Zhenshan) | Radicle/Dark     | Radicle                | 48 hours after emergence, dark                              |
| M11(Minghui)/Z11(Zhenshan) | Radicle/Light    | Radicle                | 48 hours after emergence, light                             |
| M12(Minghui)/Z12(Zhenshan) | Seedlings        | Seedling               | Three-leaf stage                                            |
| M13(Minghui)/Z13(Zhenshan) | Young shoot      | Shoot                  | Seedlings with 2 tillers                                    |
| M14(Minghui)/Z14(Zhenshan) | Young root       | Root                   | Seedlings with 2 tillers                                    |
| M15(Minghui)/Z15(Zhenshan) | Mature leaf      | Leaf                   | Stage 3 (secondary branch primordium differentiation stage) |
| M16(Minghui)/Z16(Zhenshan) | Old leaf         | Leaf                   | 4–5 cm young panicle                                        |
| M17(Minghui)/Z17(Zhenshan) | Mature sheath    | Sheath                 | Stage 3                                                     |
| M18(Minghui)/Z18(Zhenshan) | Old sheath       | Sheath                 | 4–5 cm young panicle                                        |
| M19(Minghui)/Z19(Zhenshan) | Young flag leaf  | Flag leaf              | 5 DBH (5 days before heading)                               |
| M20(Minghui)/Z20(Zhenshan) | Old flag leaf    | Flag leaf              | 14 DAH (14 days after heading)                              |
| M21(Minghui)/Z21(Zhenshan) | Panicle, stage 3 | Young panicle          | Stage 3                                                     |
| M22(Minghui)/Z22(Zhenshan) | Panicle, stage 4 | Young panicle          | Stage 4 (pistil/stamen primordium differentiation stage)    |
| M23(Minghui)/Z23(Zhenshan) | Panicle, stage 5 | Young panicle          | Stage 5 (pollen-mother cell formation stage)                |

**Table S1:** Continued

| Sample No                  | Abbreviation  | Tissues or organ | Developmental stages               |
|----------------------------|---------------|------------------|------------------------------------|
| M24(Minghui)/Z24(Zhenshan) | Young panicle | Panicle          | 4–5 cm young panicle               |
| M25(Minghui)/Z25(Zhenshan) | Old panicle   | Panicle          | Heading stage                      |
| M26(Minghui)/Z26(Zhenshan) | Young stem    | Stem             | 5 DBH                              |
| M27(Minghui)/Z27(Zhenshan) | Old stem      | Stem             | Heading stage                      |
| M28(Minghui)/Z28(Zhenshan) | Hull          | Hull             | 1 DBF (1 day before flowering)     |
| M29(Minghui)/Z29(Zhenshan) | Spikelet      | Spikelet         | 3 DAP (3 days after pollination)   |
| M30(Minghui)/Z30(Zhenshan) | Stamen        | Stamen           | 1 DBF                              |
| M31(Minghui)/Z31(Zhenshan) | Endosperm 1   | Endosperm        | 7 DAP (7 days after pollination)   |
| M32(Minghui)/Z32(Zhenshan) | Endosperm 2   | Endosperm        | 14 DAP (14 days after pollination) |
| M33(Minghui)/Z33(Zhenshan) | Endosperm 3   | Endosperm        | 21 DAP (21 days after pollination) |

**Table S2:** The qRT-PCR primers used in the present study

| Gene name      | Forward primer (5'-3')   | Reverse primer (5'-3')  |
|----------------|--------------------------|-------------------------|
| <i>OsGIL1</i>  | GCCACTGTCGGTGTCAACTAG    | ATCCCAAAGCAAATGCAAATCA  |
| <i>OsGIL2</i>  | CCACCCTACTCCTTCTAGTACCTC | CAGCAAACCTTTCTCCCTCCT   |
| <i>OsGIL3</i>  | GGAGAAGAAGAACCAGCAGTAGCA | AGCGGCGGAGAAGAACAAGA    |
| <i>OsGIL5</i>  | CACGTCACATCACCTTCCACCTC  | ACGACGACGACGACGACCAT    |
| <i>OsGIL6</i>  | CTGCTGCCTTGCTTGCTGTCA    | CATGCACGAGCACGAGACGAG   |
| <i>OsGIL7</i>  | AGCCGTCCGGCTCGTCTTCT     | AGTGCCACTCCCTCCAGGTTGA  |
| <i>OsGIL8</i>  | ATGGAGGGAGGAGGAGGTGG     | CTTCTGCGACTCGTACCTGCTCA |
| <i>OsGIL9</i>  | GCGACGAGTTCGTGATAAGTGT   | GGATTAGAATTTGGAGGGTGATG |
| <i>OsGIL13</i> | GACTGTGCCTGATTCCTTAATGGT | CAGATGGGTTCCAGTTGAAGGT  |
| <i>Actin</i>   | TGTATGCCAGTGGTCGTACCA    | CCAGCAAGGTTCGAGACGAA    |

**Table S3:** The eighty-four ALOG domain genes identified from the seven species

| Species                                             | Accession        | Gene name             | Length | Score    | E-value  |
|-----------------------------------------------------|------------------|-----------------------|--------|----------|----------|
| <i>Physcomitrella patens</i> (Moss)                 | Pp1s44_284V6.1   |                       | 289    | 206.2    | 1.20E-59 |
|                                                     | Pp1s73_217V6.1   |                       | 289    | 204.9    | 2.90E-59 |
|                                                     | Pp1s8_54V6.1     |                       | 289    | 204.9    | 2.80E-59 |
|                                                     | Pp1s10_72V6.1    |                       | 292    | 203.8    | 6.50E-59 |
| <i>Brachypodium distachyon</i> (Purple false brome) | Bradi1g32445.1   |                       | 259    | 219.7    | 7.80E-64 |
|                                                     | Bradi5g15700.1   |                       | 209    | 219.7    | 7.60E-64 |
|                                                     | Bradi3g28800.1   |                       | 207    | 219.6    | 8.50E-64 |
|                                                     | Bradi3g54800.1   |                       | 244    | 219.6    | 8.30E-64 |
|                                                     | Bradi3g49140.1   |                       | 197    | 218.7    | 1.60E-63 |
|                                                     | Bradi2g53880.1   |                       | 217    | 218.2    | 2.30E-63 |
|                                                     | Bradi2g29110.1   |                       | 292    | 215.4    | 1.70E-62 |
|                                                     | Bradi3g04960.1   |                       | 272    | 214.5    | 3.10E-62 |
|                                                     | Bradi1g58070.1   | BdG1                  | 259    | 160      | 2.10E-45 |
| <i>Oryza sativa</i> (Rice)                          | LOC_Os04g43580.1 | OsG1L4                | 202    | 220.2    | 5.50E-64 |
|                                                     | LOC_Os01g61310.1 | OsG1L7                | 212    | 220.1    | 5.80E-64 |
|                                                     | LOC_Os06g46030.1 | OsG1L2                | 277    | 219.6    | 8.20E-64 |
|                                                     | LOC_Os10g33780.1 | OsG1L5 (TAWAWA1)      | 204    | 219.6    | 8.40E-64 |
|                                                     | LOC_Os02g56610.1 | OsG1L6 (TH1/BH1/AFD1) | 248    | 219.2    | 1.10E-63 |
|                                                     | LOC_Os02g07030.1 | OsG1L1                | 270    | 217.1    | 5.00E-63 |
|                                                     | LOC_Os02g41460.1 | OsG1L3                | 209    | 217.1    | 4.90E-63 |
|                                                     | LOC_Os05g28040.1 | OsG1L9                | 284    | 217.1    | 4.80E-63 |
|                                                     | LOC_Os05g39500.1 | OsG1L8                | 238    | 215.2    | 1.90E-62 |
|                                                     | LOC_Os07g04670.1 | OsG1                  | 276    | 160.5    | 1.50E-45 |
|                                                     | LOC_Os05g27120.1 | OsG1L11*              | 180    | 121.5    | 1.70E-33 |
|                                                     | LOC_Os01g54180.1 | OsG1L10*              | 261    | 115.4    | 1.40E-31 |
|                                                     | LOC_Os08g09660.1 | OsG1L12*              | 102    | 112.9    | 7.60E-31 |
| LOC_Os08g14970.1                                    | OsG1L13*         | 189                   | 102.6  | 1.20E-27 |          |



**Table S3:** Continued

| Species                            | Accession     | Gene name | Length | Score    | E-value  |
|------------------------------------|---------------|-----------|--------|----------|----------|
| Zea mays (maize)                   | GRMZM2G147241 |           | 200    | 220.5    | 4.50E-64 |
|                                    | GRMZM2G459645 |           | 202    | 219.7    | 8.00E-64 |
|                                    | GRMZM2G027302 |           | 246    | 219.6    | 8.40E-64 |
|                                    | GRMZM2G095382 |           | 204    | 219.6    | 8.50E-64 |
|                                    | GRMZM2G168371 |           | 247    | 219.2    | 1.10E-63 |
|                                    | GRMZM5G816289 |           | 278    | 218.9    | 1.40E-63 |
|                                    | GRMZM2G034385 |           | 210    | 218.6    | 1.60E-63 |
|                                    | GRMZM2G081515 |           | 213    | 218.1    | 2.40E-63 |
|                                    | GRMZM2G034810 |           | 209    | 217.8    | 3.10E-63 |
|                                    | GRMZM2G061499 |           | 201    | 217.4    | 4.00E-63 |
|                                    | GRMZM2G359892 |           | 247    | 217.2    | 4.60E-63 |
|                                    | GRMZM2G030116 |           | 301    | 217      | 5.40E-63 |
|                                    | GRMZM2G087267 |           | 320    | 216.6    | 6.90E-63 |
|                                    | GRMZM2G413687 |           | 316    | 214.7    | 2.80E-62 |
|                                    | GRMZM2G162109 |           | 247    | 214      | 4.60E-62 |
|                                    | GRMZM2G135332 |           | 208    | 207.2    | 5.80E-60 |
|                                    | GRMZM2G142721 | ZmG1      | 256    | 158.6    | 5.80E-45 |
|                                    | GRMZM2G050917 |           | 190    | 50.2     | 1.90E-11 |
|                                    | GRMZM2G089141 |           | 154    | 39.6     | 3.40E-08 |
| Sorghum bicolor (Cereal grass)     | Sb06g022610.1 |           | 199    | 220.8    | 3.60E-64 |
|                                    | Sb04g026450.1 |           | 208    | 220.4    | 4.90E-64 |
|                                    | Sb03g045430.1 |           | 320    | 219.4    | 9.40E-64 |
|                                    | Sb10g027020.1 |           | 258    | 219.2    | 1.10E-63 |
|                                    | Sb04g036620.1 |           | 251    | 219.1    | 1.20E-63 |
|                                    | Sb01g019290.1 |           | 205    | 218.4    | 2.00E-63 |
|                                    | Sb04g004470.1 |           | 258    | 218.3    | 2.10E-63 |
|                                    | Sb03g038670.1 |           | 215    | 216.9    | 5.80E-63 |
|                                    | Sb09g023120.1 |           | 240    | 216.4    | 7.90E-63 |
|                                    | Sb09g016440.1 |           | 325    | 214.7    | 2.80E-62 |
| Sb02g002650.1                      | SbG1          | 284       | 158.4  | 6.80E-45 |          |
| Arabidopsis thaliana (Thale cress) | AT2G31160.1   | AtLSH3    | 219    | 221.9    | 1.70E-64 |
|                                    | AT3G23290.2   | AtLSH4    | 195    | 218.9    | 1.40E-63 |
|                                    | AT5G28490.1   | AtLSH1    | 190    | 218.4    | 2.00E-63 |
|                                    | AT2G42610.1   | AtLSH10   | 177    | 216.4    | 8.20E-63 |
|                                    | AT1G07090.1   | AtLSH6    | 196    | 215.6    | 1.40E-62 |
|                                    | AT5G58500.1   | AtLSH5    | 182    | 212.8    | 1.00E-61 |
|                                    | AT3G04510.1   | AtLSH2    | 201    | 210.7    | 4.80E-61 |
|                                    | AT1G78815.1   | AtLSH7    | 195    | 209.9    | 8.10E-61 |
|                                    | AT4G18610.1   | AtLSH9    | 191    | 206.9    | 7.00E-60 |
| AT1G16910.1                        | AtLSH8        | 164       | 202.7  | 1.30E-58 |          |

**Table S3:** Continued

| Species                              | Accession          | Gene name | Length | Score | E-value  |
|--------------------------------------|--------------------|-----------|--------|-------|----------|
|                                      | POPTR_0008s16750.1 |           | 203    | 223.2 | 6.60E-65 |
|                                      | POPTR_0010s08140.1 |           | 207    | 222.7 | 9.20E-65 |
|                                      | POPTR_0002s03860.1 |           | 195    | 221.5 | 2.20E-64 |
|                                      | POPTR_0014s13900.1 |           | 170    | 220.5 | 4.40E-64 |
|                                      | POPTR_0001s40140.1 |           | 176    | 219.4 | 9.50E-64 |
|                                      | POPTR_0019s03540.1 |           | 197    | 219   | 1.20E-63 |
|                                      | POPTR_0005s24730.1 |           | 199    | 218.8 | 1.50E-63 |
|                                      | POPTR_0009s07990.1 |           | 223    | 218.7 | 1.60E-63 |
| Populus trichocarpa (Western poplar) | POPTR_0011s11120.1 |           | 176    | 217.1 | 4.90E-63 |
|                                      | POPTR_0001s28780.1 |           | 228    | 216.7 | 6.80E-63 |
|                                      | POPTR_0009s15930.1 |           | 183    | 215.3 | 1.80E-62 |
|                                      | POPTR_0004s05610.1 |           | 177    | 214   | 4.60E-62 |
|                                      | POPTR_0002s22690.1 |           | 170    | 213.5 | 6.40E-62 |
|                                      | POPTR_0011s16010.1 |           | 236    | 212.5 | 1.30E-61 |
|                                      | POPTR_0001s46470.1 |           | 287    | 211.3 | 3.20E-61 |
|                                      | POPTR_0011s07350.1 |           | 177    | 210.9 | 4.10E-61 |
|                                      | POPTR_0013s04360.1 |           | 187    | 210.8 | 4.40E-61 |

**Table S4:** Information and characteristics of the identified *OsGI/GILs* in the rice genome

| TIGR Loci  | Gene Name                 | E-value <sup>a</sup> | NCBI     | RAP Locus    | Interpro  | PFam    | UniProt | Probset ID             | Protein length |
|------------|---------------------------|----------------------|----------|--------------|-----------|---------|---------|------------------------|----------------|
| Os07g04670 | <i>OsGI<sup>b</sup></i>   | 1.50E-45             | -        | Os07g0139300 | IPR006936 | PF04852 | Q652I1  | OsAffx.28268.1.S1_at   | 276            |
| Os02g07030 | <i>OsGIL1</i>             | 5.00E-63             | AK106854 | Os02g0166800 | IPR006936 | PF04852 | Q0E3M2  | N/A <sup>c</sup>       | 270            |
| Os06g46030 | <i>OsGIL2</i>             | 8.20E-64             | AK068794 | Os06g0672400 | IPR006936 | PF04852 | Q6ATW6  | Os.52694.1.S1_at       | 277            |
| Os02g41460 | <i>OsGIL3</i>             | 4.90E-63             | -        | Os02g0623400 | IPR006936 | PF04852 | Q0DZF3  | N/A                    | 209            |
| Os04g43580 | <i>OsGIL4</i>             | 5.50E-64             | AK243311 | Os04g0516200 | IPR006936 | PF04852 | Q6K5X1  | OsAffx.26447.3.S1_at   | 202            |
| Os10g33780 | <i>OsGIL5<sup>b</sup></i> | 8.40E-64             | AK243306 | Os10g0478000 | IPR006936 | PF04852 | Q7XDD0  | OsAffx.26447.1.A1_x_at | 204            |
| Os02g56610 | <i>OsGIL6<sup>b</sup></i> | 1.10E-63             | AK111446 | Os02g0811000 | IPR006936 | PF04852 | Q6K1Q1  | Os.57394.1.S1_at       | 248            |
| Os01g61310 | <i>OsGIL7</i>             | 5.80E-64             | -        | Os01g0828900 | IPR006936 | PF04852 | Q941W1  | OsAffx.23881.1.S1_x_at | 212            |
| Os05g39500 | <i>OsGIL8</i>             | 1.90E-62             | -        | Os05g0472000 | IPR006936 | PF04852 | Q5W659  | OsAffx.27237.1.S1_x_at | 238            |
| Os05g28040 | <i>OsGIL9</i>             | 4.80E-63             | AK106384 | Os05g0347400 | IPR006936 | PF04852 | A3AVK3  | Os.54655.1.S1_at       | 284            |
| Os01g54180 | <i>OsGIL10*</i>           | 1.40E-31             | -        | Os01g0745200 | IPR006936 | PF04852 | B9EU95  | OsAffx.21629.1.S1_x_at | 261            |
| Os05g27120 | <i>OsGIL11*</i>           | 1.70E-33             | -        | Os05g0337600 | IPR006936 | PF04852 | Q7XRS1  | N/A                    | 180            |
| Os08g09660 | <i>OsGIL12*</i>           | 7.60E-31             | -        | Os08g0196000 | IPR006936 | PF04852 | Q8GVZ6  | OsAffx.16924.1.S1_x_at | 102            |
| Os08g14970 | <i>OsGIL13*</i>           | 1.20E-27             | -        | Os08g0248000 | IPR006936 | PF04852 | N/A     | OsAffx.29211.1.S1_at   | 189            |

a: E-value of HMMER prediction; b: Genes with reported functions; c: Not found;\* Gene named in the present study

**Table S5:** The segmental duplication events of the ALOG family genes

| Gene1          | Gene2            | Ka   | Ks   | Ka/Ks | Date(million years) | E-value |
|----------------|------------------|------|------|-------|---------------------|---------|
| AT3G04510      | AT5G28490        | 0.09 | 1.03 | 0.09  | 78.97               | 2.0E-85 |
| AT2G31160      | AT2G42610        | 0.37 | 1.35 | 0.27  | 103.87              | 5.0E-64 |
| AT1G07090      | AT5G58500        | 0.23 | 1.90 | 0.12  | 146.49              | 5.0E-84 |
| AT1G16910      | AT1G78815        | 0.16 | 0.68 | 0.24  | 52.00               | 7.0E-76 |
| AT5G28490      | POPTR_0013s04360 | 0.00 | 0.00 | 0.00  | 0.00                | 1.0E-73 |
| AT3G04510      | POPTR_0019s03540 | 0.28 | 3.94 | 0.07  | 303.18              | 2.0E-74 |
| AT3G04510      | POPTR_0013s04360 | 0.27 | 2.76 | 0.10  | 212.09              | 5.0E-70 |
| AT3G23290      | POPTR_0002s03860 | 0.21 | 4.40 | 0.05  | 338.44              | 9.0E-76 |
| Bradi2g53880   | GRMZM2G162109    | 0.21 | 0.70 | 0.30  | 53.68               | 5.0E-78 |
| Bradi2g22561   | GRMZM2G162109    | 0.28 | 0.63 | 0.45  | 48.49               | 1.0E-76 |
| Bradi2g22561   | GRMZM2G135332    | 0.20 | 0.77 | 0.26  | 59.18               | 2.0E-78 |
| Bradi2g53880   | GRMZM2G135332    | 0.20 | 0.73 | 0.27  | 56.41               | 4.0E-81 |
| Bradi2g53880   | GRMZM2G359892    | 0.21 | 0.63 | 0.34  | 48.84               | 2.0E-80 |
| Bradi2g22561   | GRMZM2G359892    | 0.28 | 0.74 | 0.38  | 57.20               | 6.0E-76 |
| Bradi2g29110   | GRMZM2G030116    | 0.20 | 1.03 | 0.20  | 79.03               | 5.0E-75 |
| Bradi1g58070   | GRMZM2G142721    | 0.37 | 0.64 | 0.58  | 49.15               | 2.0E-53 |
| Bradi3g54800   | Bradi5g15700     | 0.29 | 0.44 | 0.66  | 34.12               | 6.0E-71 |
| Bradi3g28800   | Bradi5g15700     | 0.18 | 0.33 | 0.54  | 25.24               | 1.0E-68 |
| Bradi3g49140   | Bradi5g15700     | 0.20 | 0.44 | 0.45  | 33.87               | 3.0E-71 |
| Bradi3g49140   | Bradi3g54800     | 0.20 | 0.61 | 0.32  | 47.18               | 4.0E-74 |
| Bradi3g28800   | Bradi3g54800     | 0.27 | 0.56 | 0.48  | 42.70               | 2.0E-75 |
| Bradi3g28800   | Bradi3g49140     | 0.21 | 0.39 | 0.55  | 29.63               | 4.0E-71 |
| Bradi2g29110   | Bradi2g53880     | 0.26 | 0.94 | 0.28  | 72.16               | 1.0E-80 |
| Bradi2g22561   | Bradi2g53880     | 0.20 | 0.74 | 0.27  | 57.30               | 8.0E-78 |
| Bradi1g32445   | Bradi3g04960     | 0.31 | 0.53 | 0.58  | 40.64               | 3.0E-72 |
| LOC_Os01g61310 | LOC_Os05g28040   | 0.22 | 0.53 | 0.42  | 41.12               | 1.0E-77 |
| LOC_Os01g61310 | LOC_Os05g39500   | 0.15 | 0.45 | 0.33  | 34.42               | 3.0E-83 |
| LOC_Os02g41460 | LOC_Os10g33780   | 0.19 | 0.47 | 0.40  | 36.52               | 3.0E-69 |
| LOC_Os02g41460 | LOC_Os02g56610   | 0.26 | 0.44 | 0.59  | 33.81               | 5.0E-74 |
| LOC_Os02g41460 | LOC_Os04g43580   | 0.11 | 0.41 | 0.28  | 31.30               | 5.0E-79 |
| LOC_Os02g07030 | LOC_Os06g46030   | 0.28 | 0.36 | 0.79  | 27.68               | 5.0E-74 |
| LOC_Os04g43580 | LOC_Os10g33780   | 0.17 | 0.29 | 0.59  | 22.04               | 1.0E-69 |
| LOC_Os05g28040 | LOC_Os05g39500   | 0.31 | 0.50 | 0.62  | 38.73               | 2.0E-76 |
| LOC_Os07g04670 | Sb02g002650      | 0.33 | 0.44 | 0.75  | 34.22               | 3.0E-57 |
| Bradi1g58070   | Sb02g002650      | 0.37 | 0.66 | 0.57  | 50.51               | 4.0E-54 |
| LOC_Os07g04670 | GRMZM2G142721    | 0.30 | 0.40 | 0.74  | 30.93               | 2.0E-60 |
| LOC_Os01g61310 | GRMZM2G359892    | 0.15 | 0.51 | 0.30  | 39.52               | 3.0E-79 |
| LOC_Os01g61310 | GRMZM2G162109    | 0.16 | 0.49 | 0.33  | 37.37               | 7.0E-79 |
| LOC_Os05g39500 | GRMZM2G359892    | 0.20 | 0.48 | 0.41  | 37.29               | 1.0E-80 |
| LOC_Os05g39500 | GRMZM2G162109    | 0.19 | 0.41 | 0.45  | 31.85               | 1.0E-80 |

**Table S5:** Continued

| Gene1         | Gene2         | Ka   | Ks   | Ka/Ks | Date(million years) | E-value |
|---------------|---------------|------|------|-------|---------------------|---------|
| Sb09g023120   | GRMZM2G135332 | 0.20 | 0.57 | 0.34  | 43.99               | 9.0E-79 |
| Sb09g023120   | GRMZM2G162109 | 0.08 | 0.21 | 0.38  | 16.02               | 1.0E-84 |
| Sb09g016440   | GRMZM2G030116 | 0.08 | 0.29 | 0.27  | 22.25               | 6.0E-97 |
| Sb03g038670   | GRMZM2G162109 | 0.16 | 0.33 | 0.49  | 25.52               | 4.0E-70 |
| Sb03g038670   | GRMZM2G135332 | 0.04 | 0.22 | 0.17  | 17.30               | 2.0E-79 |
| Sb03g038670   | GRMZM2G359892 | 0.17 | 0.42 | 0.41  | 32.47               | 4.0E-70 |
| Sb02g002650   | GRMZM2G142721 | 0.08 | 0.15 | 0.55  | 11.69               | 4.0E-92 |
| GRMZM2G095382 | GRMZM2G459645 | 0.03 | 0.15 | 0.24  | 11.34               | 2.0E-81 |
| GRMZM2G095382 | GRMZM2G142721 | 0.11 | 0.36 | 0.30  | 27.41               | 4.0E-81 |
| GRMZM2G027302 | GRMZM2G168371 | 0.04 | 0.25 | 0.15  | 18.97               | 2.0E-94 |
| GRMZM2G034810 | GRMZM2G135332 | 0.06 | 0.19 | 0.29  | 14.48               | 2.0E-87 |
| GRMZM2G034810 | GRMZM2G359892 | 0.16 | 0.49 | 0.32  | 37.98               | 1.0E-79 |
| GRMZM2G061499 | GRMZM2G095382 | 0.14 | 0.46 | 0.31  | 35.58               | 4.0E-77 |
| GRMZM2G061499 | GRMZM2G147241 | 0.03 | 0.16 | 0.20  | 12.50               | 2.0E-82 |
| GRMZM2G135332 | GRMZM2G162109 | 0.21 | 0.50 | 0.42  | 38.52               | 2.0E-77 |
| GRMZM2G162109 | GRMZM2G359892 | 0.07 | 0.22 | 0.32  | 17.14               | 6.0E-84 |
| GRMZM2G135332 | GRMZM2G359892 | 0.19 | 0.53 | 0.35  | 41.09               | 2.0E-77 |

**Table S6:** The conserved motifs identified from ALOG family proteins

| Motif No | Motif length | Sequence                                                          |
|----------|--------------|-------------------------------------------------------------------|
| Motif 1  | 61           | RYENQKRRDWNTFGQYLRNHRPPLSLSRCSGA<br>HVLEFLRYLDQFGKTKVHTQLCPFFGHPN |
| Motif 2  | 26           | CPCPLRQAWGSLDALIGRLRAAYEEN                                        |
| Motif 3  | 36           | PETNPFGARAVRRLYLREVRDSQAKARGISYEKKRK                              |
| Motif 4  | 26           | MDLSPNPESPGSGDGGGGGGGAGGS                                         |
| Motif 5  | 19           | HHHHHHHMIPGQEPSAAD                                                |
